# Supplementary material for: Clustering U-14 Portuguese regional team football players by lower limb strength, power, dynamic balance, speed and change of direction: understanding the field position factor
Source: PeerJ. 2023 Jul 19;11:e15609. doi: 10.7717/peerj.15609 (PMC10362840; doi:10.7717/peerj.15609)
Supplement: Supplemental Information 1 [file peerj-11-15609-s001.xlsx]

## Sheet: data
ID	Age	BM	H	Maturity_offset_v2	CMJ	SJ	RSR	CompositeScore	Dif_Abs_anterior	Dif_Rel_anterior	Dif_Abs_posterolateral	Dif_Rel_posterolateral	Dif_Abs_posteromedial	Dif_Rel_posteromedial	Slalom	FBF	Sprint_30m
1	13.71	51.1	170	-1.2	35	31.9	1.06	91.475	5.67	5.29	0.33	0.72	0.67	1.83	6.52	9.55	4.85
2	13.54	63.5	170	-0.6	34.2	33.4	1.22	111.795	1.33	3.1	3.67	1.18	3.33	0.75	7.14	9.05	4.87
3	14.15	63.3	172	0	25.4	24.8	1.04	102.765	3.67	4.95	5.33	4.69	3.33	5.11	5.58	8.38	5.15
5	13.63	55	160	-3.5	26.2	27.8	0.57	80.99	0.67	0.65	1	0.98	9.93	9.15	5.89	8.44	5.2
6	13.58	50	165	-1.5	28.8	26.1	0.45	90.04	0.67	0.02	0.33	0.73	0	1.1	6.52	9.49	5
7	13.41	54.1	168	-1.3	30.5	29.2	0.87	86.355	2.33	1.85	9	8.72	4	3.2	6.08	8.73	4.54
8	13.55	53	170	-0.8	29.7	27	1.08	60.27	3.67	5.64	3.67	6.91	7.33	5.28	6.92	11.66	4.941
9	13.68	52.1	175	-0.3	30.2	29.8	0.54	93.165	3.33	3.66	0.33	0.37	1.67	1.83	6.25	11.42	4.7408
10	14.07	65	170	-0.6	21.7	20.6	0.31	86.725	3.33	2.13	10.67	13.53	13	16.06	7.22	10.69	4.98
12	14.28	62	173	-0.5	24.8	23.2	0.99	95.195	3	2.49	6.33	7.84	9.67	11.42	7.75	12.78	5.0072
13	14.23	55.6	175	-0.1	35.5	29.9	0.95	92.865	6.33	5.51	3.33	1.3	9.33	7.63	6.99	12.37	4.88
14	12.45	61.3	170	-0.8	27.9	27.9	0.68	97.77	5	6.37	3.67	2.81	12	12.4	6.86	10.24	4.76
15	14.3	52.4	162	-0.5	25.7	27.7	0.71	111.6	4.33	7.18	1	1.86	3	0.47	6.48	12.17	5.54
16	14.03	57.1	170	-1.2	25.6	27.8	0.58	100.935	0	0	1.67	1.75	3	3.16	6.84	12.23	5
17	14.35	70	170	0.1	24.2	22	0.41	85.455	4.33	5.7	11	11.53	3.33	2.66	7.04	9.44	5.5
18	13.49	51.4	171	-1.1	32.3	27.9	0.64	92.625	4.67	4.34	10.33	9.87	3.33	4.71	6.72	10.97	4.8894
19	14.04	59.2	176	-0.5	32.3	30.5	0.9	85.13	6.67	8.23	3.33	5.31	5.33	3.47	7.12	12.95	4.696
20	14.2	47	170	-1.4	29.8	31	0.59	91.92	0.67	1.35	2	3.2	1.33	2.53	7.64	9.06	4.81
21	14.24	57.5	170	-1.5	32	31.9	1.27	110.02	0.67	1.25	4	1.7	3.67	1.34	6.46	12.49	4.77
22	13.59	59	165	-0.9	31	37.4	1.13	110.69	4.67	6.28	1.33	2.93	9	11.73	7.22	13.07	4.84
23	13.6	42	165	-0.8	32.5	32.1	0.73	104.665	1.33	0.75	2	0.9	1.33	3	6.35	8.97	5.15
24	14.13	41	154	-2.5	36.7	32	1.18	95.26	2.33	2.62	4.33	4.87	4.67	5.24	5.79	10.09	4.97
